# Supplementary material
Source: publisher figshare collection journal article supplement (https://sage.figshare.com/ndownloader/files/15289973)
Supplement: Supplementary file 1 [file 15289973]

## ***INTERVIEW SCHEDULE FOR THE MOTHER***

*(Details of last 2 years or in child's awareness)*

### **Developmental History**

1. Birth History of child.
2. Developmental milestones.
3. History of any serious illness.
4. General comprehension and interest in age related activities.
5. History of consultation with a mental health professional.

### **Birth**

6. Birth of a child in the family. Yes/no.
  - a. If yes, relationship with the child and child's reaction to it.
  - b. If no, any birth in family of friends. If yes, closeness with that family and child's reaction to it.
7. Curiosity shown by the child towards topic of birth. If yes, in what context.
8. Discussion regarding birth in front of the child.
9. Understanding of children's reactions about birth in general.

### **Illness**

10. Any instance of pet falling ill. Yes/no. If yes, child's reaction to it.
11. Serious illness in the family. Yes/no.
  - a. If yes, relation with the child and child's reaction to it.
  - b. If no, any serious illness in family of friends. If yes, closeness with that family and child's reaction to it.
12. Curiosity shown by the child towards topic of injury/illness. If yes, give details.
13. Any discussion regarding injury/illness in the presence of the child.
14. Understanding of child's reactions about injury/illness in general

## **Death**

15. Any dead or dying animal seen by the child. Yes/no. If yes, child's reaction to it.
16. Occurrence of death in immediate family. Yes/no.
  - a. If yes, relation with the child and child's reaction to it.
  - b. If no, any death in family of friends. If yes, closeness with that family and child's reaction to it.
17. Performance of any rituals concerning dead members of family. Yes/No. If yes, frequency.
18. Child's participation/presence in any family rituals regarding dead members of family. Yes/no.
19. If yes, child's reaction to it.
20. Any questions asked by the child. If yes give details.
21. Curiosity shown by the child towards topic of death. If yes, give details.
22. Any spontaneous comments by the child about death (Ex; plant dying etc).
23. Any discussion regarding death in the presence of the child.
24. Understanding of child's reactions about death in general.

### ***STORY FOR THE CHILD***

There was a girl/boy; her/his name was Minnie/Sunny. She/he lived with her/his parents. When Minnie/Sunny was 3 years old her/his brother/sister Sunny/Minnie was born.

Their house had lot of bright flowers. She/he also had one brown dog, Bobo. Bobo was with her/his parents for many years, even before Minnie/Sunny was born. Bobo was very naughty and one day he pulled out one of the flower plants.

After some time Minnie/Sunny started going to school. There were many other children of her/his age and she/he made new friends. In school she/he learnt alphabets and numbers. She/he also played with friends there. One day her/his friend got hurt while playing.

She/he liked going to school, but enjoyed playing with Bobo most and would go around the neighborhood with him. On Sundays she/he would play with ball with him. During winters they would sometimes lie down in the garden, under sunlight. Gradually Bobo grew old and would get tired easily.

One day he fell ill.

Now Bobo was very weak to play or go around the neighborhood with Minnie/Sunny. One day when Minnie/Sunny came back from school, her/his mother was standing near the door. When Minnie/Sunny reached there she told her/him that, Bobo has died.

### ***INTERVIEW SCHEDULE FOR THE CHILD***

1. Where did Minnie's brother (or Sunny's sister) come from?
2. How did Minnie/Sunny feel about it?
3. What will happen to the plant which Bobo pulled out?
4. Will it grow again or will it die? (If it dies, then will all plants die?)
5. How did Minnie's/ Sunny's friend get hurt?
6. What will happen now?
7. Who all will grow old like Bobo?
8. What will happen when they grow old?
9. How did Bobo fall ill?
10. What will happen next?
11. When mother told that Bobo is dead what would Minnie/Sunny do?
12. What did Sunny think where Bobo has gone, when he died?

13. What happens when a person dies?

14. How will you know that someone is dead?

15. Like Bobo, who else will die?

16. Do you think every one has to die?

17. Will Minnie's/Sunny's parents also die?

18. What will Minnie/Sunny do when her/his parents die?

(To wrap up the story - What will happen when Minnie/Sunny grows up? What will they do? )
